# Supplementary material
Source: PubMed Central journal article supplement (PMC1636554)

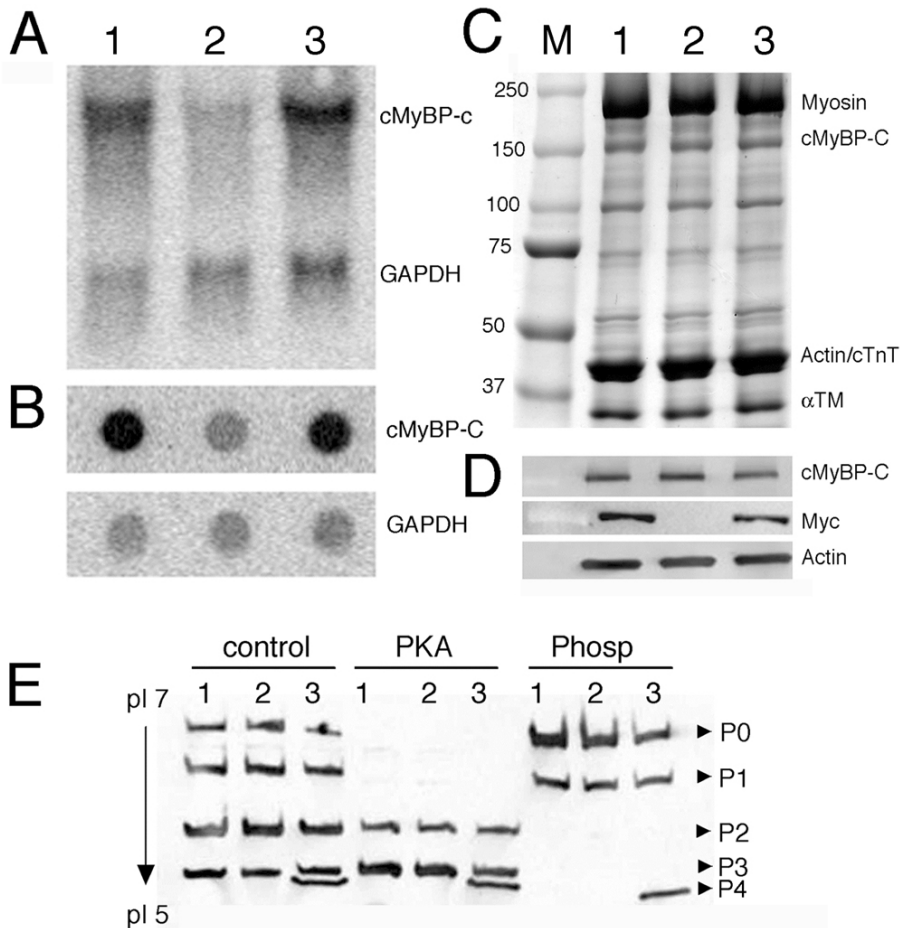

Supplement: pnas_0607069103_1.pdf [file pnas_0607069103_1.pdf]

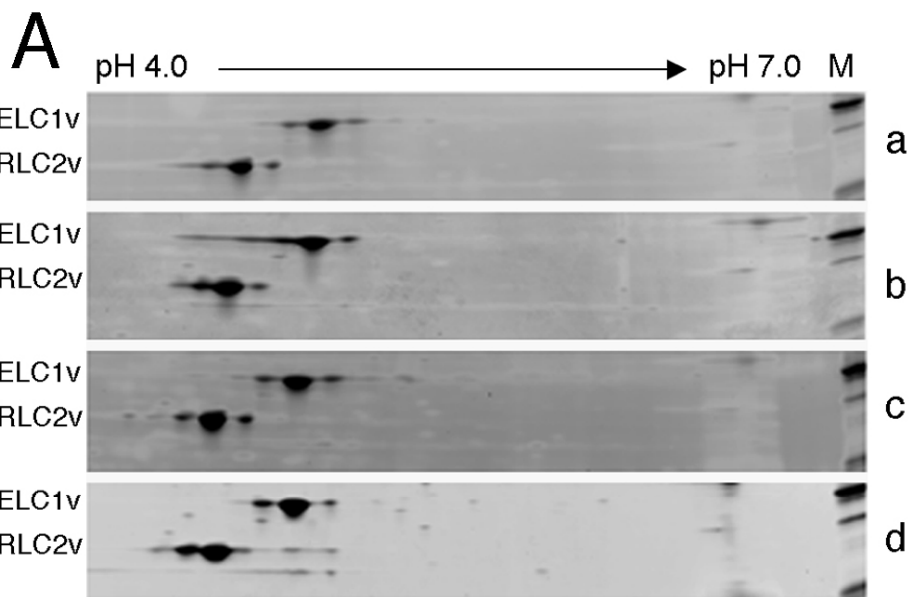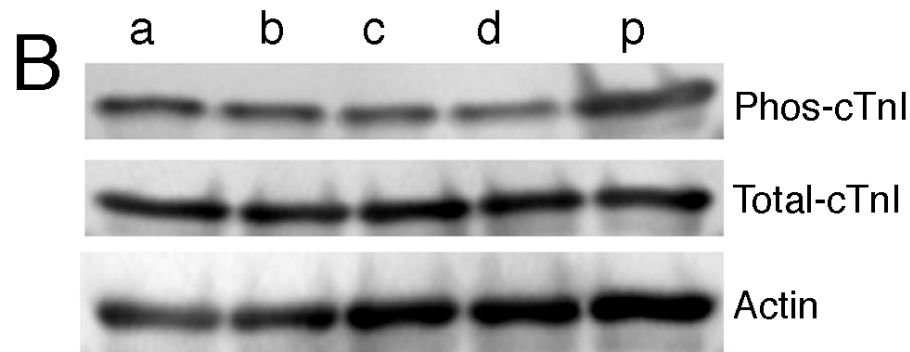

Supplement: pnas_0607069103_2.pdf [file pnas_0607069103_2.pdf]

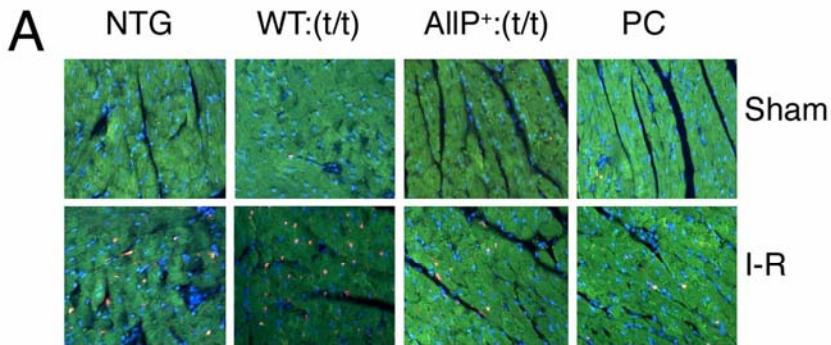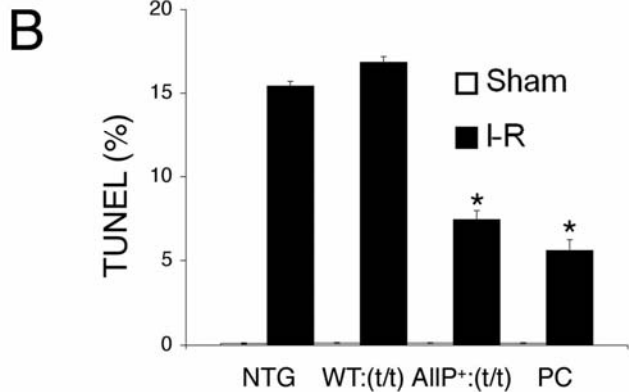

Supplement: pnas_0607069103_3.pdf [file pnas_0607069103_3.pdf]
